# Supplementary material
Source: PubMed Central journal article supplement (PMC3071086)
Supplement: neo1304_0374SD1.pdf [file neo1304_0374SD1.pdf]

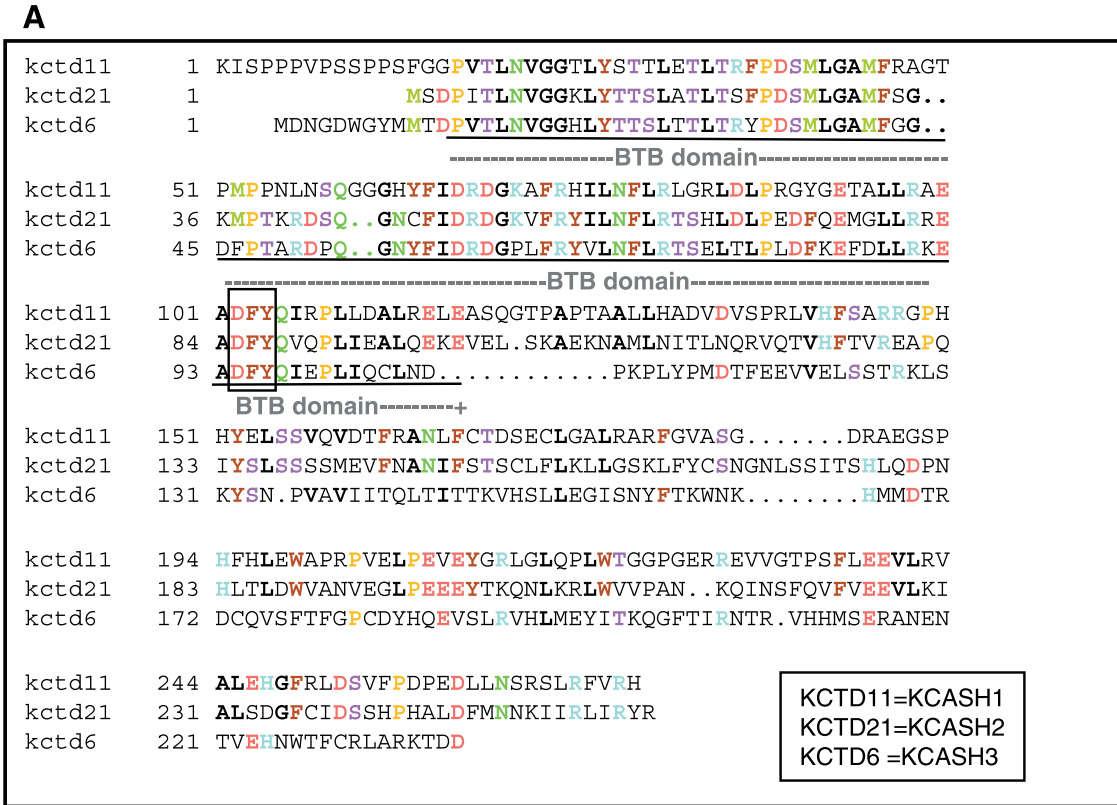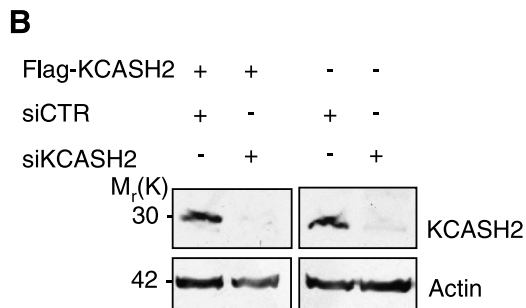

**Figure W1.** (A) Sequence alignment of human KCTD proteins. Matching amino acids are colored. The BTB domain is underlined on the sequences. DFY is included in a black frame. A gene tree alignment of the three genes (with all the homolog from the different species) is available in the Ensemble Web site at the following link: [http://www.ensembl.org/Homo\\_sapiens/Gene/Comparative\\_Tree?collapse=1698431%2C1698526%2C1698557%2C1698502%2C1698474%2C1698581%2C1698491%2C1698481%2C1698496%2C1698492%2C1698476;db=core;g=ENSG00000213859;r=17:7255208-7258258;t=ENST00000333751](http://www.ensembl.org/Homo_sapiens/Gene/Comparative_Tree?collapse=1698431%2C1698526%2C1698557%2C1698502%2C1698474%2C1698581%2C1698491%2C1698481%2C1698496%2C1698492%2C1698476;db=core;g=ENSG00000213859;r=17:7255208-7258258;t=ENST00000333751). (B) D283 cells transfected with siCTR and siCASH2, in the presence or absence of Flag-tagged KCASH2, were immunoblotted with anti-KCASH2 and antiactin antibodies. Different amounts of total lysates were analyzed to compare exogenous and endogenous signal (1:3 ratio, respectively). Unless otherwise indicated, all experiments were performed in triplicate, and mean  $\pm$  SD is shown.

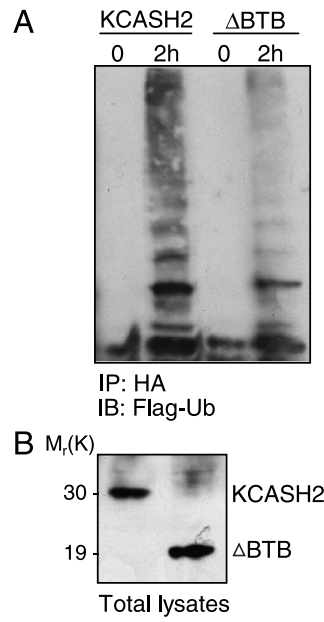

**Figure W2.** (A) KCASH2 shows E3 ubiquitin ligase activity. HEK293T cells, transfected with an HA-tagged KCASH2 or  $\Delta$ BTB KCASH2 ( $\Delta$ BTB) vectors, were treated with MG132 (50  $\mu$ M) 6 hours before lysis. Immunoprecipitation of cell lysates was carried out with an anti-HA antibody, and immunocomplexes were subjected to an *in vitro* ubiquitination assay in the presence of Flag-ubiquitin (Flag-Ub) and immunoblotted with an anti-Flag antibody to detect proteins ubiquitinated by KCASH2. (B) KCASH2 and  $\Delta$ BTB-KCASH2 levels in total cell lysates.

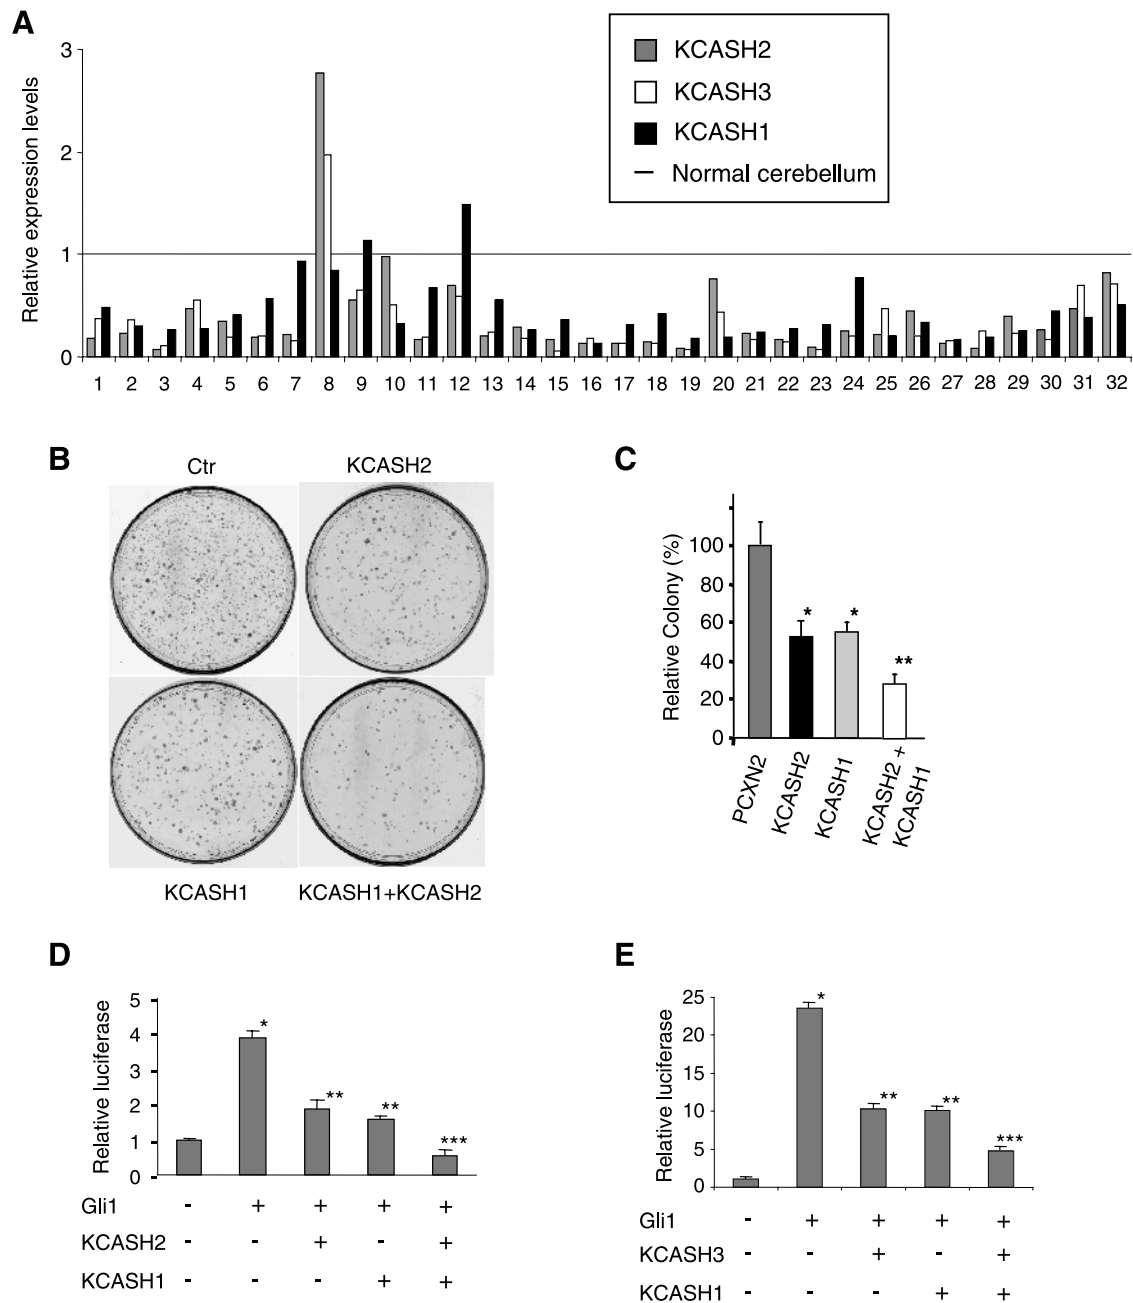

**Figure W3.** (A) Expression levels of KCASH1-3 in MB samples. Expression levels are shown relative to the average value of normal cerebellum (value set to 1). (B, C) Colony formation assay: Daoy cells were transfected with indicated vectors. (B) Representative images from experiments are shown. (C) Relative colony numbers are indicated.  $*P < .05$  KCASH2 and KCASH1 versus control vector;  $**P < .05$  KCASH1 + KCASH2 versus KCASH1 and KCASH2. Unless otherwise indicated, all experiments were performed in triplicate, and mean  $\pm$  SD is shown. (D, E) Relative luciferase activity in HEK293T cells transfected with 12 $\times$  Gli-Luc and pRL-TK Renilla and the indicated plasmids. Luciferase data are indicated as mean ratios with respect to pRL-TK Renilla Luciferase control (Ctr).  $*P < .05$  Gli1 versus control.  $**P < .05$  KCASH1, KCASH2 or KCASH3 + Gli1 versus Gli1.  $***P < .05$  KCASH2 + KCASH1 (or KCASH3 + KCASH1) + Gli1 versus KCASH1, -2, or -3 + Gli1.
